# Supplementary material for: Circular Economy Approach to Enhance Soil Fertility Based on Recovering Phosphorus from Wastewater
Source: MDPI journal article supplement (doi:10.3390/agronomy13061513), 2023-05-30
Supplement: s1 [file s1]

Archive with 4 entries (4 files):
- Figure S1.pdf
- Figure S2.pdf
- Figure S3.pdf
- Figure S4.pdf
