# Supplementary figures and images for: Circular Economy Approach to Enhance Soil Fertility Based on Recovering Phosphorus from Wastewater
Source: MDPI journal article supplement (doi:10.3390/agronomy13061513), 2023-05-30

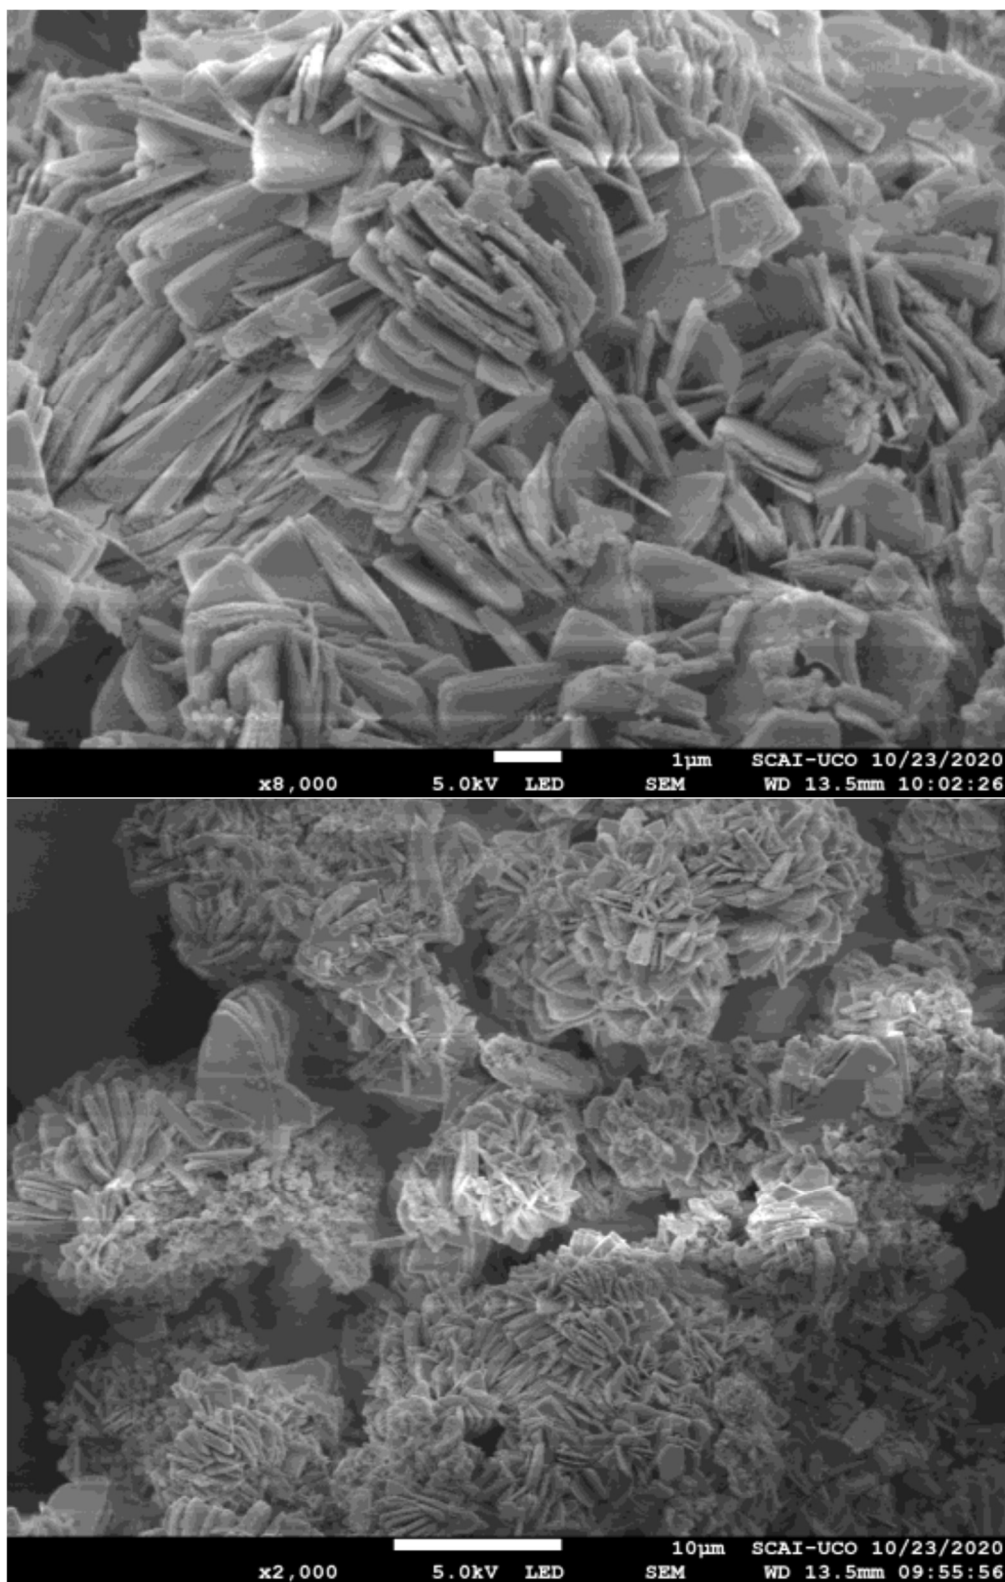

Figure S4: Scanning electron microscope image of the industrial process vivianite.

Supplement: s1 [file s1]

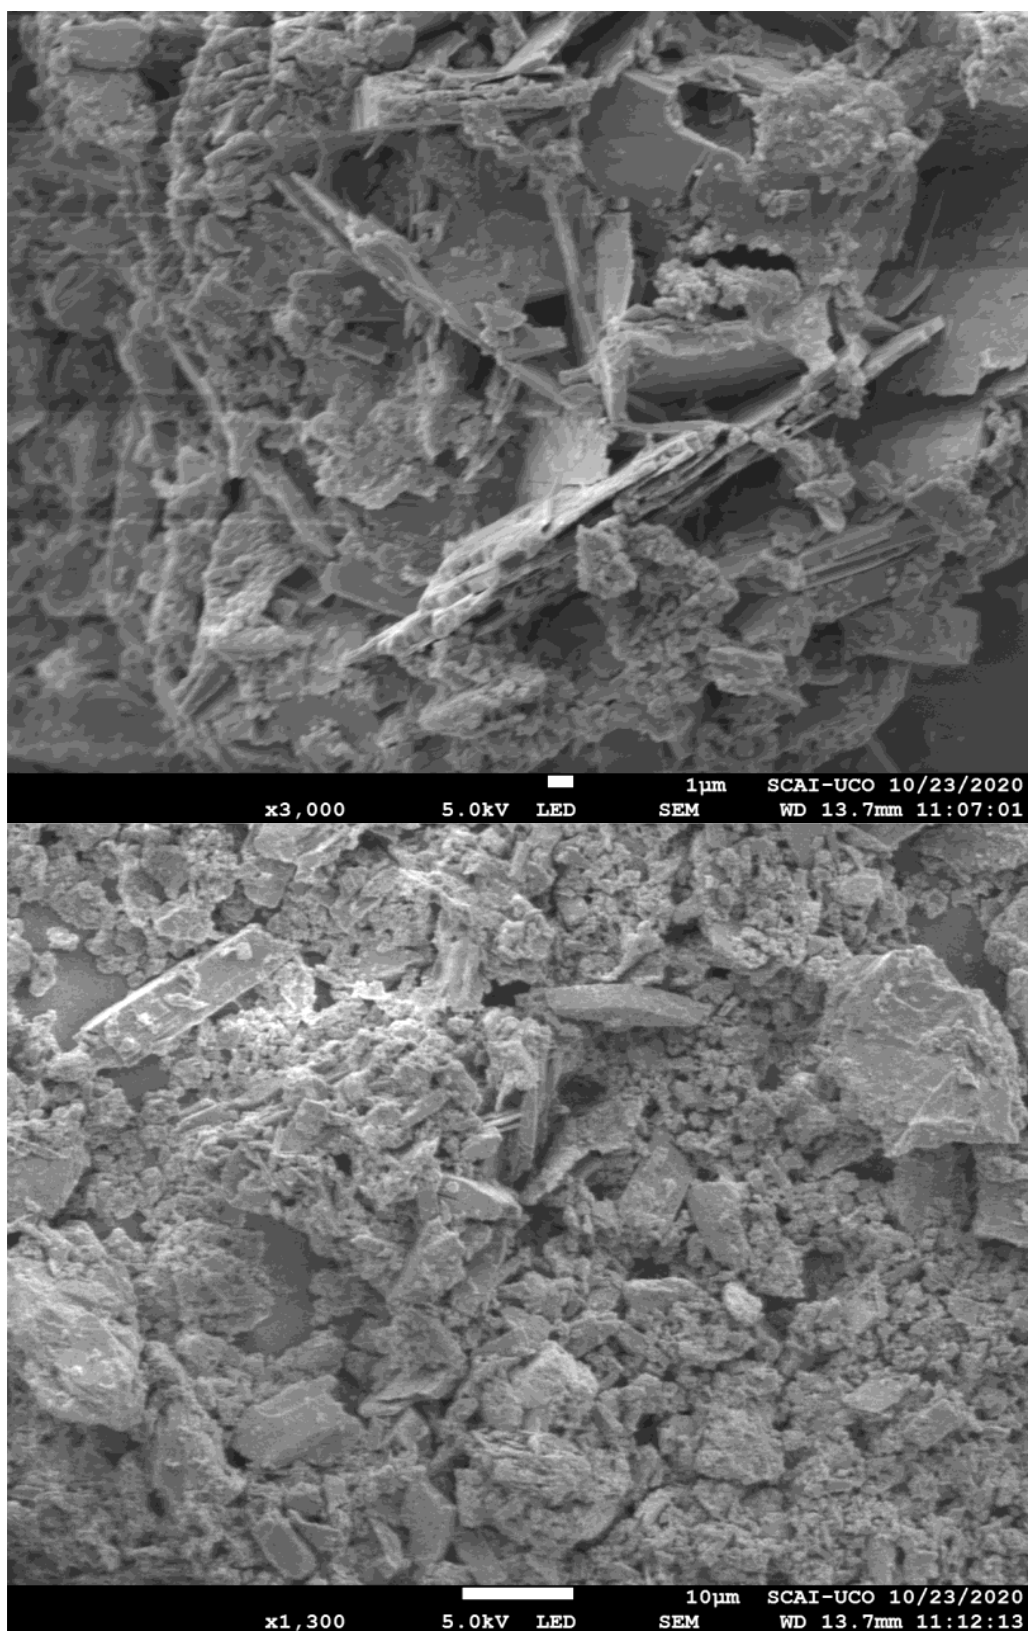

Figure S1. Scanning electron microscope image of the WP1 vivianite.

Supplement: s1 [file s1 › Figure S1.pdf]

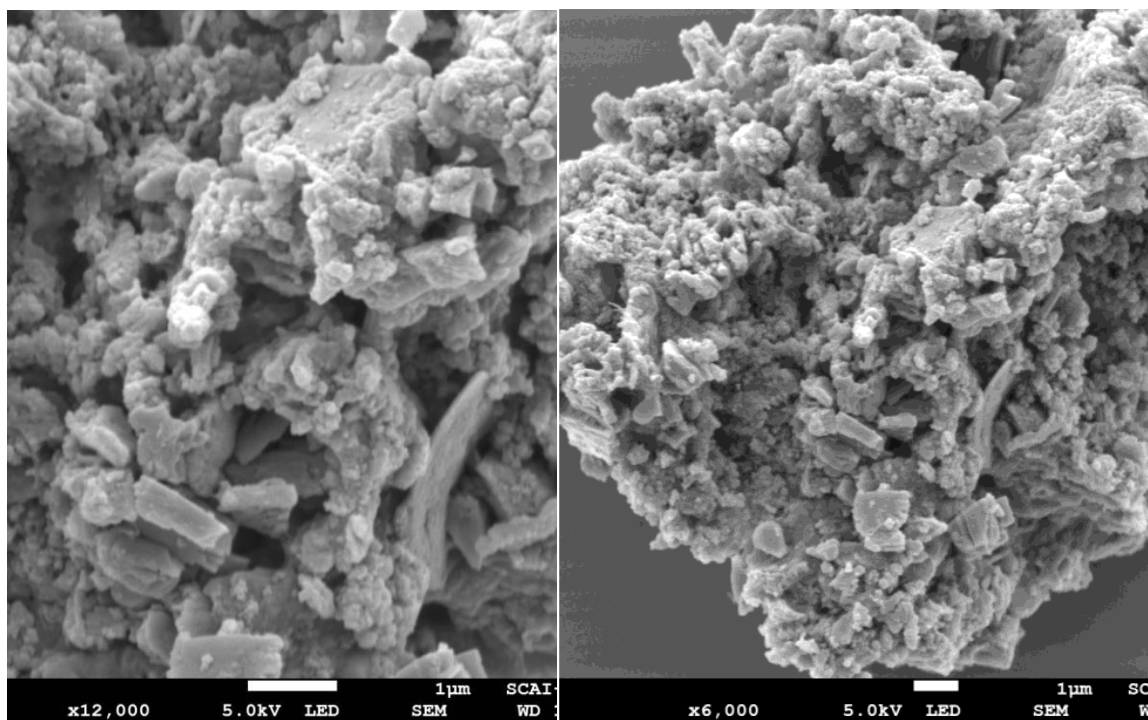

Figure S2. Scanning electron microscope image of the WP2 vivianite.

Supplement: s1 [file s1 › Figure S2.pdf]

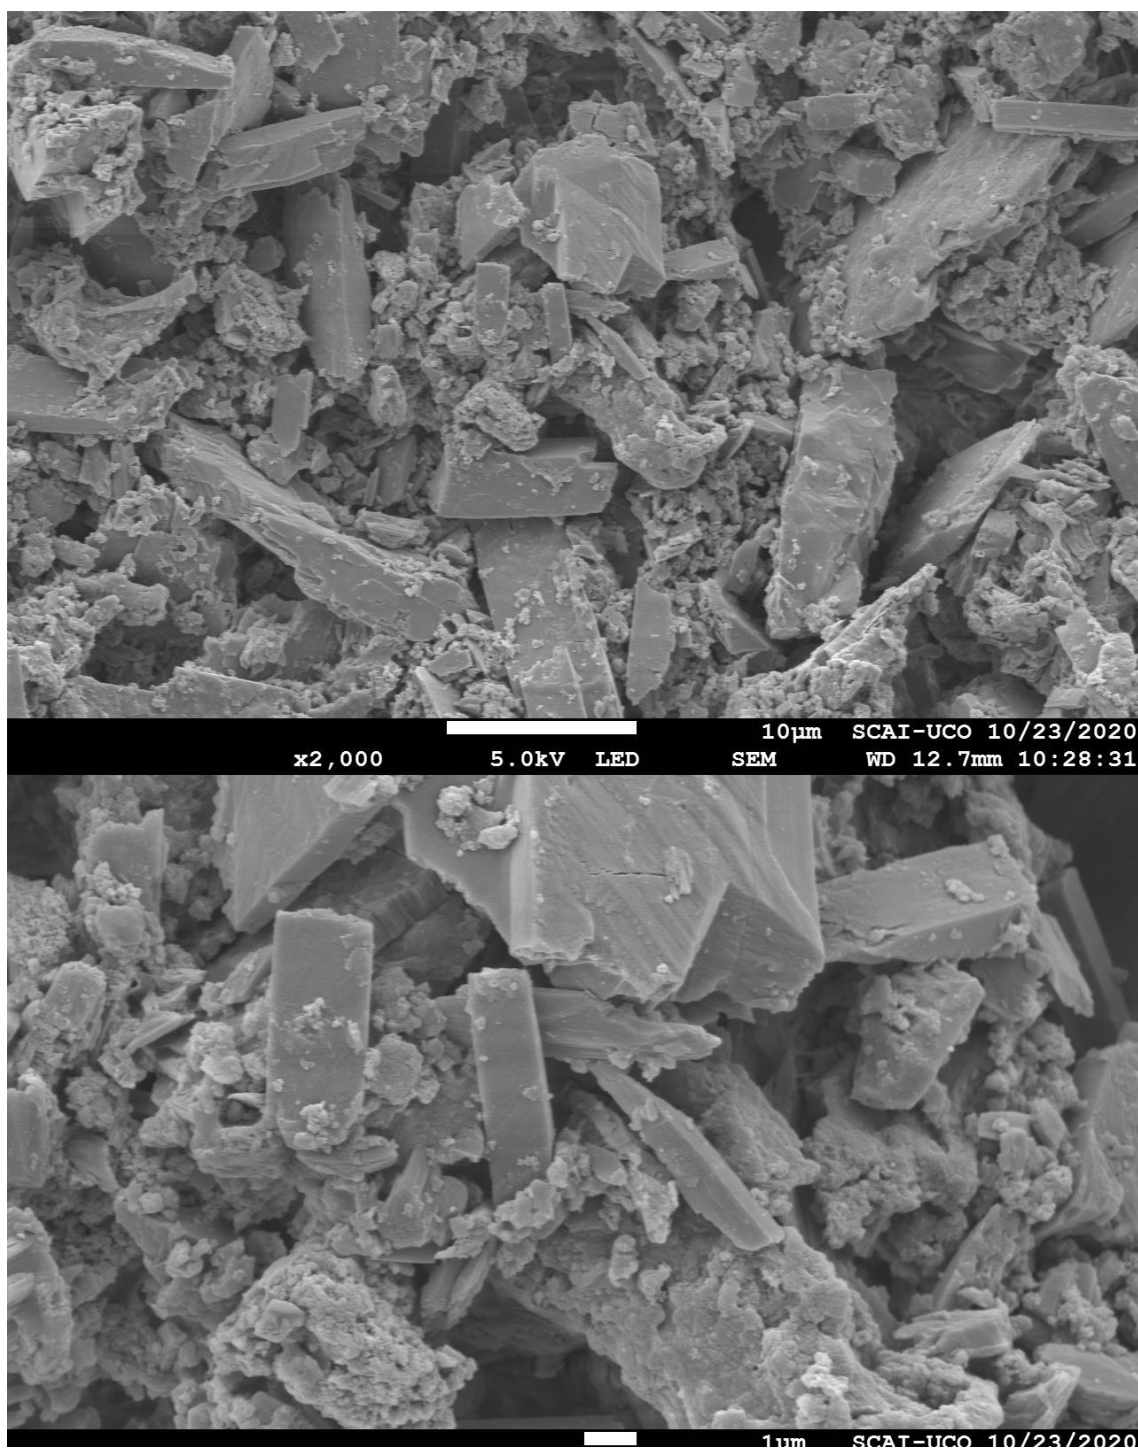

Figure S3. Scanning electron microscope image of the WP3 vivianite.

Supplement: s1 [file s1 › Figure S3.pdf]
